# Supplementary material
Source: publisher site journal article supplement (https://www.dovepress.com/article/433843)
Supplement: Supplementary file 1 [file get_supplementary_file.php]

**Supplementary Table 1** SII levels and other clinical characteristics in T2DM patients by DPN

| **Variables** | **non-DPN** | **DPN** | ***P*-value** |
| --- | --- | --- | --- |
| **(n =870 )** | **(n = 590)** |
| Male, n (%) | 424 (48.74) | 292 (49.49) | 0.777 |
| Age (years) | 56.48±10.90 | 64.52±10.15 | 0.000 |
| Height (m) | 1.60±0.08 | 1.60±0.09 | 0.582 |
| Weight (kg) | 63.05±11.30 | 61.89±11.61 | 0.061 |
| BMI (kg/m2) | 24.42±3.61 | 24.04±3.76 | 0.059 |
| <24kg/m2, n (%) | 426 (48.97) | 326 (55.25) | 0.018 |
| 24-28kg/m2, n (%) | 320 (36.78 ) | 182 (30.85) | 0.019 |
| ≥28kg/m2, n (%) | 124 (14.25 ) | 82 (13.90) | 0.849 |
| Duration of diabetes (years) | 6.50±5.73 | 9.26±6.90 | 0.000 |
| ≤5 years, n (%) | 447 (51.38) | 199 (33.73) | 0.000 |
| 6–10 years, n (%) | 270 (31.03) | 216 (36.61) | 0.027 |
| >10 years, n (%) | 153 (17.59) | 175 (29.66) | 0.000 |
| Smoking, n (%) | 201 (23.10) | 113 (19.15) | 0.071 |
| drinking, n (%) | 163 (18.74) | 72 (12.20) | 0.001 |
| SBP (mmHg) | 130.28±19.90 | 135.16±21.52 | 0.000 |
| DBP (mmHg) | 73.10±11.97 | 70.47±11.93 | 0.000 |
| Hypertension, n (%) | 402 (46.21) | 358 (60.68) | 0.000 |
| TC (mmol/L) | 4.93±1.34 | 4.76±1.33 | 0.016 |
| TG (mmol/L) | 2.58±3.08 | 2.03±1.73 | 0.000 |
| HDL-C (mmol/L) | 1.16±0.36 | 1.19±0.36 | 0.099 |
| LDL-C (mmol/L) | 2.79±0.96 | 2.78±1.02 | 0.816 |
| Dyslipidaemia, n (%) | 616 (70.80) | 383 (64.92) | 0.048 |
| FBG (mmol/L) | 10.76±5.14 | 11.07±5.14 | 0.278 |
| PBG (mmol/L) | 15.92±5.23 | 16.34±4.95 | 0.118 |
| GE index | 3.74±0.56 | 4.01±0.61 | 0.000 |
| HbA1c (mmol/mol) | 78.84±26.52 | 83.82±28.28 | 0.001 |
| HbA1c (%) | 9.36±2.43 | 9.82±2.59 | 0.001 |
| <7%, n (%) | 141 (16.21) | 73 (12.37) | 0.042 |
| 7-9%, n (%) | 295 (33.91) | 170 (28.81) | 0.040 |
| ≥9%, n (%) | 434 (49.89) | 347 (58.81) | 0.001 |
| Neutrophil(*109 /L) | 4.36±1.97 | 4.90±2.43 | 0.000 |
| Lymphocyte (*109 /L) | 1.75±0.63 | 1.52±0.59 | 0.000 |
| NLR | 2.93±2.55 | 3.86±3.09 | 0.000 |
| PLT (×109 /L) | 195.93±63.21 | 200.07±75.78 | 0.275 |
| SII | 570.81±541.33 | 786.62±749.15 | 0.000 |
| Cr (μmol/L) | 64.26±22.72 | 73.71±29.32 | 0.000 |
| eGFR (mL/min/1.73 m2) | 98.94±21.56 | 86.00±24.09 | 0.000 |
| ≥90, n (%) | 639 (73.45) | 312 (52.88) | 0.000 |
| 60-90, n (%) | 185 (21.26) | 169 (28.64) | 0.001 |
| 30-60, n (%) | 46 (5.29) | 109 (18.47) | 0.000 |
| ACR (mg/g) | 159.72±23.06 | 278.89±35.95 | 0.005 |
| Microalbuminuria, n (%) | 218 (25.06) | 176 (29.83) | 0.044 |
| Macroalbuminuria, n (%) | 50 (5.75) | 78 (13.22) | 0.000 |
| Albuminuria, n (%) | 268 (30.80 ) | 254 (43.05) | 0.000 |
| ABI | 1.04±0.11 | 0.99±0.20 | 0.000 |
| VPT (V) | 12.94±4.73 | 35.86±8.76 | 0.000 |
| Diabetic complications (%) | | | |
| DKD, n (%) | 288 (33.10) | 303 (51.36) | 0.000 |
| DR, n (%) | 84 (9.66) | 99 (16.78) | 0.000 |
| CHD, n (%) | 50 (5.75) | 81 (13.73) | 0.000 |
| Stroke, n (%) | 139 (15.98) | 152 (25.76) | 0.000 |
| PAD, n (%) | 48 (5.52) | 105 (17.80) | 0.000 |

Notes: Data are mean ±SD.

Abbreviations: SD, standard deviation; DPN, diabetic peripheral neuropathy; BMI, body mass index; SBP, systolic blood pressure; DBP, diastolic blood pressure; TC, total cholesterol; TG, triglyceride; HDL-C, high-density lipoprotein cholesterol; LDL-C, low-density lipoprotein cholesterol; FBG, fasting blood glucose; PBG, 2 hour postprandial blood glucose; GE index, glycemic exposure index; HbA1c, glycated hemoglobin A1c; NLR, neutrophil-to-lymphocyte; PLT, platelet; SII, systemic immune–inflammation index; Cr, creatinine; eGFR, estimated glomerular filtration rate; ACR, albumin- to-creatinine ratio; ABI, ankle-brachial index; VPT, vibration perception threshold; DKD, diabetic kidney disease; DR, diabetic retinopathy; CHD, coronary heart disease; PAD, peripheral arterial disease.

**Supplementary Table 2** SII levels and other clinical characteristics in T2DM patients by sex

| **Variables** | **Men** | **Women** | ***P*-value** |
| --- | --- | --- | --- |
| **(n =716 )** | **(n =744 )** |
| Age (years) | 58.07±11.70 | 61.32±10.69 | 0.000 |
| BMI (kg/m2) | 24.46±3.40 | 24.09±3.92 | 0.064 |
| Overweight, n (%) | 273 (38.13) | 229 (30.78) | 0.003 |
| Obesity, n (%) | 96 (13.41) | 110 (14.78) | 0.450 |
| Duration of diabetes (years) | 6.89±6.12 | 8.31±6.53 | 0.000 |
| Smoking, n (%) | 312 (43.58) | 2 (0.27) | 0.000 |
| Drinking, n (%) | 231 (32.26) | 4 (0.54) | 0.000 |
| Hypertension, n (%) | 353 (49.30) | 407 (54.70) | 0.039 |
| Dyslipidaemia, n (%) | 511 (71.37) | 488 (65.59) | 0.019 |
| FBG (mmol/L) | 11.22±5.25 | 10.57±5.16 | 0.017 |
| PBG (mmol/L) | 16.54±5.06 | 15.65±5.15 | 0.001 |
| GE index | 3.85±0.59 | 3.87±0.61 | 0.551 |
| HbA1c (mmol/mol) | 82.85±27.19 | 78.94±27.38 | 0.006 |
| HbA1c (%) | 9.73±2.49 | 9.37±2.51 | 0.006 |
| <7%, n (%) | 78 (10.89) | 136 (18.28) | 0.000 |
| 7-9%, n (%) | 230 (32.12) | 235 (31.59) | 0.826 |
| ≥9%, n (%) | 408 (56.98) | 373 (50.13) | 0.009 |
| Neutrophil(*109 /L) | 4.57±2.13 | 4.59±2.23 | 0.874 |
| Lymphocyte (*109 /L) | 1.60±0.63 | 1.71±0.61 | 0.000 |
| NLR | 3.46±2.92 | 3.16±2.71 | 0.041 |
| PLT (×109 /L) | 185.40±63.24 | 209.34±71.45 | 0.000 |
| SII | 650.38±639.68 | 665.38±644.82 | 0.656 |
| eGFR (mL/min/1.73 m2) | 94.71±24.62 | 92.76±22.31 | 0.111 |
| ACR (mg/g) | 189.95±24.21 | 226.66±32.22 | 0.361 |
| Microalbuminuria, n (%) | 193 (26.96) | 201 (27.02) | 0.979 |
| Macroalbuminuria, n (%) | 74 (10.34) | 54 (7.26) | 0.038 |
| Albuminuria, n (%) | 267 (37.29 ) | 255 (34.27) | 0.229 |
| ABI | 1.04±0.15 | 1.00±0.15 | 0.000 |
| VPT (V) | 16.72±10.64 | 16.20±9.52 | 0.324 |
| Diabetic complications (%) | | | |
| DKD, n (%) | 300 (41.90) | 291 (39.11) | 0.278 |
| DR, n (%) | 74 (10.34) | 109 (14.65) | 0.013 |
| CHD, n (%) | 68 (9.50) | 63 (8.47) | 0.492 |
| Stroke, n (%) | 154 (21.51) | 137 (18.41) | 0.139 |
| PAD, n (%) | 61 (8.52) | 92 (12.37) | 0.017 |

Abbreviations: SII, systemic immune-inflammation index; T2DM, type 2

diabetes mellitus; BMI, body mass index; FBG, fasting blood glucose; PBG, 2 hour postprandial blood glucose; GE index, glycemic exposure index; HbA1c,

glycated hemoglobin A1c; NLR, neutrophil-to-lymphocyte; PLT, platelet; eGFR, estimated glomerular filtration rate; ACR, albumin- to-creatinine ratio; ABI,

ankle-brachial index; VPT, vibration perception threshold; DKD, diabetic kidney disease; DR, diabetic retinopathy; CHD, coronary heart disease; PAD,

peripheral arterial disease.
